# Supplementary material for: Images from the Haematologica atlas of hematologic cytology: Chediak-Higashi syndrome
Source: PubMed Central journal article supplement — Haematologica. 2021 Mar 1;106(3):655. doi: 10.3324/haematol.2020.278224 (PMC7927889; doi:10.3324/haematol.2020.278224), 2021-03-01
Supplement: 2020_278224-Disclosures_Contributions.pdf [file 2020_278224-Disclosures_Contributions.pdf]

Haematologica  
HAEMATOL/2020/278224  
Version 1

Images from the Haematologica atlas of hematologic cytology: Chediak-Higashi syndrome

Ana P. De Azambuja and Carlo L. Balduini

Disclosures: None

Contributions: Authors equally contributed
